# Supplementary material for: Preparation and Characterisation of Waste Poultry Feathers Composite Fibreboards
Source: PubMed Central journal article supplement (PMC7663731; doi:10.3390/ma13214964), 2020-11-04
Supplement: materials-13-04964-s001.pdf [file materials-13-04964-s001.pdf]

## Supplementary Materials: Preparation and Characterisation of Waste Poultry Feathers Composite Fibreboards

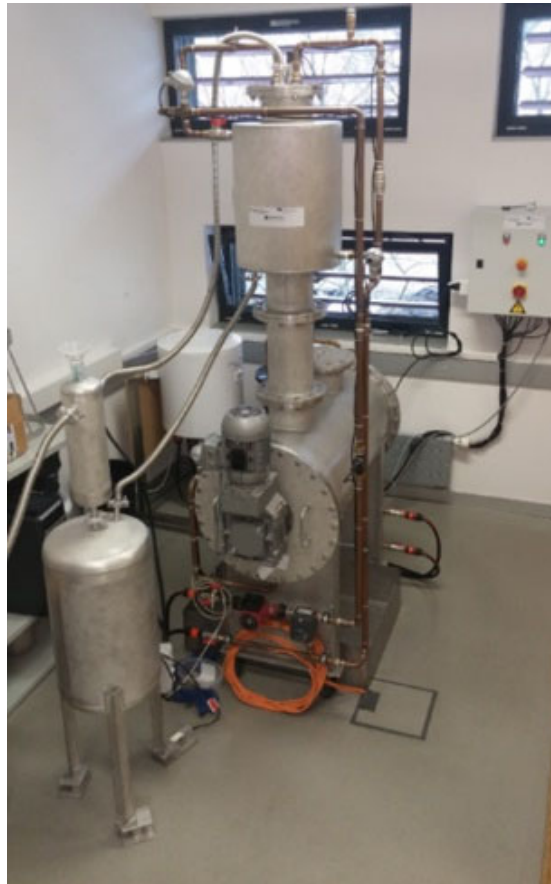

Figure S1: The vacuum drier.

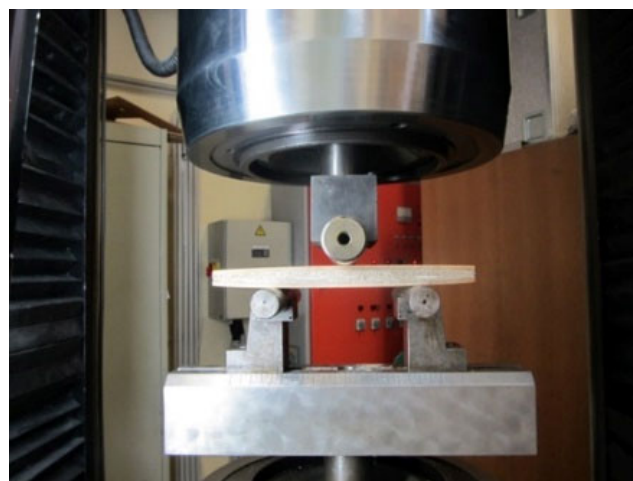

Figure S2: The three-point bending test performance using the servo-hydraulic testing machine INSTRON 1255.
